# Supplementary material
Source: ML conference proceedings conference paper supplement (https://proceedings.neurips.cc/paper_files/paper/2020/hash/dc49dfebb0b00fd44aeff5c60cc1f825-Abstract.html)
Supplement: Supplementary file [file dc49dfebb0b00fd44aeff5c60cc1f825-Supplemental.pdf]

## 1 A Ablation Study

2 In this ablation study, we further investigate the power of the policies searched by our approach  
3 and the closely related method AutoAug [1]. We rank the augmentation operations based on their  
4 probabilities in decreasing order. Therefore, the operations ranked on the top could be deemed as the  
5 most important augmentations. Then we gradually remove the most important operations from the  
6 searched policy one by one and investigate the change of the Top-1 test error rates, as reported in  
7 Tab. 1. As can be seen, when the most important operations are removed gradually, the performance  
8 of the AutoAug remains similar. On the contrary, during this process, the performance of ours drops  
9 significantly. This shows that the augmentations in our policy are much more powerful than those in  
10 the AutoAug.

Table 1: **Ablation Study.** Top-1 test error rates (%) is reported (lower is better). We report Mean  $\pm$  STD (standard deviation) of the test error rates.

| Approach                | Apply All        | Without Top 1    | Without Top 1 $\sim$ 2 | Without Top 1 $\sim$ 3 |
|-------------------------|------------------|------------------|------------------------|------------------------|
| AutoAug [1] (our impl.) | $3.40 \pm 0.070$ | $3.45 \pm 0.066$ | $3.36 \pm 0.065$       | $3.46 \pm 0.082$       |
| Ours                    | $2.91 \pm 0.062$ | $3.10 \pm 0.056$ | $3.13 \pm 0.099$       | $3.19 \pm 0.110$       |

11 **B Proof**

12 The proof of the proposition in Sec. 3.3 is as follows:

13 **Proof.** The KL-divergence between  $p_{\theta\theta}$  and  $p_{\bar{\theta}\theta}$  is as follows:

$$\begin{aligned}
 D_{\mathcal{KL}}(p_{\theta\theta} \parallel p_{\bar{\theta}\theta}) &= \Sigma_{\tau}(p_{\theta\theta}(\tau) \log \frac{p_{\theta\theta}(\tau)}{p_{\bar{\theta}\theta}(\tau)}) \\
 &= \Sigma_{\tau}(p_{\theta\theta}(\tau) \log \frac{\prod_{i=1}^N p_{\theta}(\tau_i)}{\prod_{i=1}^K p_{\bar{\theta}}(\tau_i) \prod_{i=K+1}^N p_{\theta}(\tau_i)}) \\
 &= \Sigma_{\tau}(p_{\theta\theta}(\tau) \log \frac{\prod_{i=1}^K p_{\theta}(\tau_i)}{\prod_{i=1}^K p_{\bar{\theta}}(\tau_i)}) \\
 &= \Sigma_{\tau}(p_{\theta\theta}(\tau) \Sigma_{i=1}^K \log p_{\theta}(\tau_i)) - \Sigma_{\tau}(p_{\theta\theta}(\tau) \Sigma_{i=1}^K \log p_{\bar{\theta}}(\tau_i)). \quad (1)
 \end{aligned}$$

14 Since  $\Sigma_{\tau}(p_{\theta\theta}(\tau) \Sigma_{i=1}^K \log p_{\theta}(\tau_i))$  is constant with respect to  $\bar{\theta}$ , the  $\bar{\theta}^*$  that minimizes  $D_{\mathcal{KL}}(p_{\theta\theta} \parallel p_{\bar{\theta}\theta})$   
 15 should satisfy:

$$\bar{\theta}^* = \arg \max_{\bar{\theta}} \Sigma_{\tau}(p_{\theta\theta}(\tau) \Sigma_{i=1}^K \log p_{\bar{\theta}}(\tau_i)) = \arg \max_{\bar{\theta}} \Sigma_{\tau}(p_{\theta\theta}(\tau) \frac{1}{K} \Sigma_{i=1}^K \log p_{\bar{\theta}}(\tau_i)). \quad (2)$$

16 By Jensen's inequality with the strictly concave function  $\log(\cdot)$ , we have:

$$\Sigma_{\tau}(p_{\theta\theta}(\tau) \frac{1}{K} \Sigma_{i=1}^K \log p_{\bar{\theta}}(\tau_i)) \leq \Sigma_{\tau}(p_{\theta\theta}(\tau) \log(\Sigma_{i=1}^K \frac{1}{K} p_{\bar{\theta}}(\tau_i))). \quad (3)$$

17 The equality holds if and only if  $p_{\bar{\theta}}(\tau_1) = p_{\bar{\theta}}(\tau_2) = \dots = p_{\bar{\theta}}(\tau_K)$  for all the possible  $\tau$ . In other  
 18 words, the KL divergence is minimized when  $\bar{\theta}$  is uniform sampling.  $\square$

19 **C Investigation of the Number of Epochs of Fine-tuning**

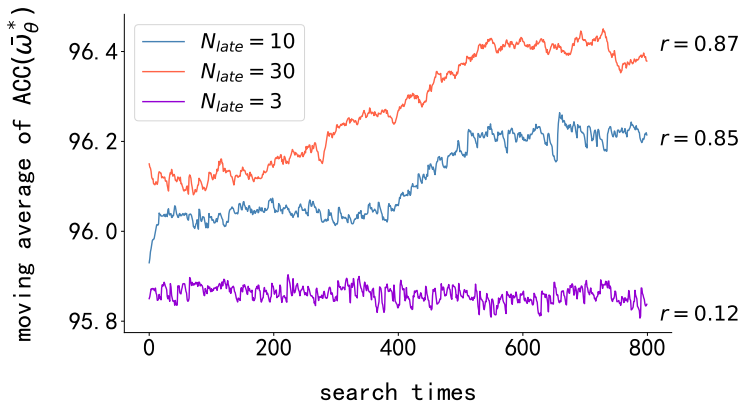

Figure 1: We investigate the key hyper-parameter  $N_{late}$  by visualizing the difference it brings to the search dynamics. All the experiments are conducted with ResNet-18 [4] on CIFAR-10 [6]. The Pearson correlation coefficient ( $r$ ) between  $ACC(\bar{\omega}_\theta^*)$  and  $ACC(\omega^*)$  are annotated in the figure.

20 We investigate different numbers of epochs in the late training stage ( $N_{late}$ ). By adjusting  $N_{late}$   
 21 we can still maintain the reliability of policy evaluation to a large extent. The results are shown in  
 22 Fig. 1. We find that the policy optimization becomes hard to converge when a small  $N_{late}$  is used,  
 23 as the performances among different  $\bar{\omega}_\theta^*$  are too close. And when a large  $N_{late}$  is used,  $ACC(\bar{\omega}_\theta^*)$  is  
 24 notably higher. However, the final performance does not benefit from this, as the correlation between  
 25  $ACC(\bar{\omega}_\theta^*)$  and  $ACC(\omega^*)$  does not change much between  $N_{late} = 10$  and  $N_{late} = 30$ . Thus we  
 26 choose  $N_{late} = 10$  as the final configuration for the efficiency.

27 **D Augmentation Elements**

28 The augmentation elements are listed as follows. We use almost the same elements as AutoAug’s [1].  
29 But we do not introduce Cutout [3] and Sample Pairing [5] into the search space.

Table 2: **List of Candidate Augmentation Elements.**

| Elements             | Ranges of Magnitude |
|----------------------|---------------------|
| Horizontal Shear     | {0.1, 0.2, 0.3}     |
| Vertical Shear       | {0.1, 0.2, 0.3}     |
| Horizontal Translate | {0.15, 0.3, 0.45}   |
| Vertical Translate   | {0.15, 0.3, 0.45}   |
| Rotate               | {10, 20, 30}        |
| Color Adjust         | {0.3, 0.6, 0.9}     |
| Posterize            | {4.4, 5.6, 6.8}     |
| Solarize             | {26, 102, 179}      |
| Contrast             | {1.3, 1.6, 1.9}     |
| Sharpness            | {1.3, 1.6, 1.9}     |
| Brightness           | {1.3, 1.6, 1.9}     |
| Autocontrast         | None                |
| Equalize             | None                |
| Invert               | None                |

## 30 E Datasets Splitting Details

Table 3: **Datasets Splitting Details.** On both of the two CIFAR [6] datasets, we use a validation set of 10,000 images, which is randomly split from the original training set, which contains 50,000 images, to calculate the validation accuracy during the searching. For ImageNet [2], we use a reduced subset of ImageNet train set when searching the policies, although our method is affordable to be directly performed on ImageNet. This subset contains 128,000 images and 500 classes (randomly chosen). We also set aside a validation set (no intersection with the reduced train subset and containing the same 500 classes) of 50,000 images split from the training dataset for getting the validation accuracy.

| Dataset              | Train Set Size | Validation Set Size | Test Set Size |
|----------------------|----------------|---------------------|---------------|
| CIFAR-10 [6]         | 40,000         | 10,000              | 10,000        |
| CIFAR-100 [6]        | 40,000         | 10,000              | 10,000        |
| Reduced ImageNet [2] | 128,000        | 50,000              | 50,000        |

## 31 **F More Implementation Details**

32 **CIFAR** Once the policies have been learned, they are applied to training the models again from  
33 scratch, as well as another network models for the investigation of the transferability of the policies  
34 between different network models. For ResNet-18 and Wide-ResNet-28-10, we use a mini-batch size  
35 of 256 and the SGD with a Nesterov momentum of 0.9. The weight decay is set to 0.0001, and the  
36 cosine learning rate scheme is utilized with the maximum learning rate of 0.4. The number of epochs  
37 is set to 300. For PyramidNet+ShakeDrop and Shake-Shake ( $26 \times 2 \times 32d$ ), we use the same settings  
38 as those in [7].

39 For a fair comparison among different augmentation methods, we apply a basic pre-processing  
40 following the convention of the state-of-the-art CIFAR-10 models: standardizing the data, random  
41 horizontal flips with 50% probability, zero-padding and random crops, and finally Cutout [3] with  
42  $16 \times 16$  pixels. During our comparison, the searched policy is applied on top of this basic pre-  
43 processing step. That is, for each input training image, the basic pre-processing is first performed,  
44 then the policies learned by an augmentation method, and finally the Cutout.

45 **ImageNet** Once the policies have been obtained, they are applied to training ResNet-50 from  
46 scratch, as well as another network model ResNet-200 for the study of policy transferability. The  
47 hyper-parameters used to train ResNet-50 and ResNet-200 are the same as those in [1] except a cosine  
48 learning rate scheduler. Moreover, our learned policies are applied on top of a standard Inception-style  
49 pre-processing, which includes standardizing, random horizontal flips with 50% probability, and  
50 random distortions of colors [8]. This pre-processing step is uniformly applied to all the methods in  
51 comparison.

52 **G Details of Searched Policies.**

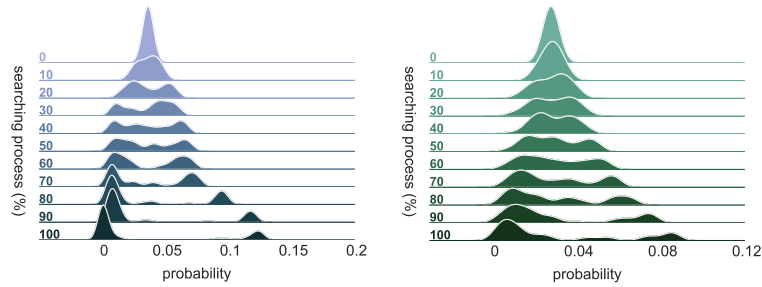

Figure 2: **The changes of probability distributions of the searched policies on CIFAR-10 (the left) and ImageNet (the right) over time.**

53 We visualize the changes of probability distributions of the searched policies on CIFAR-10 and  
54 ImageNet over time. We calculate the marginal distribution parameters of the first element in our  
55 augmentation operations. As shown in the picture, our searched policies have strong preferences,  
56 as only a few augmentation operations are preserved eventually, and probabilities of many other  
57 operations are close to zero, which is quite different from other methods like [1, 7, 9].

58 **References**

- 59 [1] E. D. Cubuk, B. Zoph, D. Mane, V. Vasudevan, and Q. V. Le. Autoaugment: Learning augmentation  
60 strategies from data. In *Proceedings of the IEEE conference on computer vision and pattern recognition*,  
61 pages 113–123, 2019.
- 62 [2] J. Deng, W. Dong, R. Socher, L.-J. Li, K. Li, and L. Fei-Fei. Imagenet: A large-scale hierarchical image  
63 database. In *2009 IEEE conference on computer vision and pattern recognition*, pages 248–255. Ieee, 2009.
- 64 [3] T. DeVries and G. W. Taylor. Improved regularization of convolutional neural networks with cutout. *arXiv*  
65 *preprint arXiv:1708.04552*, 2017.
- 66 [4] K. He, X. Zhang, S. Ren, and J. Sun. Deep residual learning for image recognition. In *Proceedings of the*  
67 *IEEE conference on computer vision and pattern recognition*, pages 770–778, 2016.
- 68 [5] H. Inoue. Data augmentation by pairing samples for images classification. *arXiv preprint arXiv:1801.02929*,  
69 2018.
- 70 [6] A. Krizhevsky, G. Hinton, et al. Learning multiple layers of features from tiny images. 2009.
- 71 [7] S. Lim, I. Kim, T. Kim, C. Kim, and S. Kim. Fast autoaugment. In *Advances in Neural Information*  
72 *Processing Systems*, pages 6662–6672, 2019.
- 73 [8] C. Szegedy, W. Liu, Y. Jia, P. Sermanet, S. Reed, D. Anguelov, D. Erhan, V. Vanhoucke, and A. Rabinovich.  
74 Going deeper with convolutions. In *Proceedings of the IEEE conference on computer vision and pattern*  
75 *recognition*, pages 1–9, 2015.
- 76 [9] X. Zhang, Q. Wang, J. Zhang, and Z. Zhong. Adversarial autoaugment. *arXiv preprint arXiv:1912.11188*,  
77 2019.
